# Supplementary material for: Extent and Sources of Heavy Metal Pollution from Discharging Rivers in the Bohai Region, China
Source: MDPI journal article supplement (doi:10.3390/w16070982), 2024-03-28
Supplement: s1 [file s1]

**Table S1.** Coordinates of river sampling points and industries located in the vicinity of the rivers

| Sampling Point | River Name         | Coordinates       | Industries along Riverbanks                                               |
|----------------|--------------------|-------------------|---------------------------------------------------------------------------|
| 2              | Wangdao            | 122.1576, 37.4025 | Textile Printing                                                          |
| 4              | Zhangcun           | 122.0133, 37.4773 | Textile and Garment Printing                                              |
| 5              | Yangting (Sewer)   | 121.9510, 37.4710 | Industrial Park, Battery Production,                                      |
| 6              | Yangting           | 122.0015, 37.4254 | Coating and Textile Printing                                              |
| 8              | Jinshan Harbor     | 121.7640, 37.4330 | Aluminum Plating, Plastic Production                                      |
| 10             | Yuniao             | 121.5519, 37.3889 | Textile Printing, Dyeing Factories                                        |
| 11             | Xinan              | 121.4721, 37.3729 | Textile Printing and Dyeing Factories                                     |
| 12             | Guangdang          | 121.4381, 37.4429 | Construction Materials, Rubber, Plastic and Steel Factory                 |
| 13             | Waijia             | 121.3059, 37.4588 | Fertilizer Production, Alloy Castings, Steel Processing, Textile Printing |
| 15             | Jia                | 121.2840, 37.5367 | Knitting Factory, Metal Printing, Steel and Mechanical Parts Production   |
| 19             | Wang               | 119.9613, 37.3320 | Chemical Production, Steel Processing                                     |
| 20             | Jiaolai            | 119.5431, 36.7219 | Diverse Chemical Industries                                               |
| 21             | Wei                | 119.4444, 36.8959 | Textile Printing and Dyeing                                               |
| 22             | Yellow downstream  | 118.5380, 37.6060 | Chemical Plants, Steel and Rubber Production                              |
| 23             | Yellow upstream    | 118.3008, 37.5026 | Chemical Plants, Textile Printing, Petroleum Industry                     |
| 27             | Majia              | 117.5543, 37.8769 | Chemical Plants, Textile Printing, Mechanical Parts Production            |
| 28             | Zhangweixin        | 117.5433, 38.0285 | Steel Processing, Mechanical Parts Production                             |
| 30             | Hai                | 117.6680, 38.9860 | Industrial Park, Coating, Chemical Plants                                 |
| 32             | Yongding           | 117.6674, 39.1415 | Industry Park, Steel and Plastic Industry                                 |
| 37             | Luan               | 119.1428, 39.4649 | — —                                                                       |
| 40             | Liugu              | 120.3736, 40.3295 | Petroleum Industry                                                        |
| 44             | Raoyang downstream | 121.7995, 41.1213 | Chemical Plants                                                           |
| 45             | Raoyang upstream   | 121.8545, 41.1946 | — —                                                                       |
| 46             | Liao downstream    | 121.8134, 40.9414 | Oil Processing, Chemical Plants, Steel Industry                           |
| 47             | Liao upstream      | 121.8679, 41.0558 | Oil Processing, Chemical Plants, Steel Industry                           |

|    |          |                   |                                                                   |
|----|----------|-------------------|-------------------------------------------------------------------|
| 49 | Daliao   | 122.242, 40.6796  | Battery Production, Petroleum Industry, Plastic Production        |
| 50 | Daqing   | 122.4007, 40.3623 | Mechanical Parts Production, Battery Production, Plastic Industry |
| 51 | Xiongyue | 122.0942, 40.1695 | Chemical Plants                                                   |
| 52 | Fudu     | 121.9761, 40.0892 | Chemical Industry                                                 |
| 56 | Fuzhou   | 121.6964, 39.6774 | Ship Construction Industry                                        |
| 57 | Anzi     | 121.8425, 39.3861 | Coating Industry, Food Production                                 |
